# Supplementary material
Source: PubMed Central journal article supplement (PMC3530943)
Supplement: Supp_Fig1.pdf [file Supp_Fig1.pdf]

**A**

Colony Count Consistency For Each Stem/Progenitor Isolation

| Isolation Number | Peritenon (Mean $\pm$ SD) | Tendon Proper (Mean $\pm$ SD) | Technical Replicate t-test (p-value) |
|------------------|---------------------------|-------------------------------|--------------------------------------|
| 1                | 0.73 $\pm$ 0.31           | 21.67 $\pm$ 2.08              | <0.0001                              |
| 2                | 0.38 $\pm$ 0.13           | 31.00 $\pm$ 2.65              | <0.0001                              |
| 3                | 0.20 $\pm$ 0.16           | 14.33 $\pm$ 6.03              | 0.0047                               |
| 4                | 0.23 $\pm$ 0.13           | 40.00 $\pm$ 5.20              | <0.0001                              |
| 5                | 1.75 $\pm$ 0.34           | 56.00 $\pm$ 3.56              | <0.0001                              |
| 6                | 5.70 $\pm$ 0.84           | 54.50 $\pm$ 3.32              | <0.0001                              |
| 7                | 3.60 $\pm$ 0.43           | 46.00 $\pm$ 3.61              | <0.0001                              |
| 8                | 6.50 $\pm$ 0.50           | 50.00 $\pm$ 2.00              | <0.0001                              |

Numbers are given as colonies per 1000 cells seeded. For each isolation, cells were from eight Achilles tendons of four mice per isolation. Thus, each isolation represents a paired biological replicate where stem/progenitors were isolated from both the tendon proper and peritenon regions of. Means and standard deviations (SD) are determined from counting colonies in 3-4 technical replicate flasks.

**B**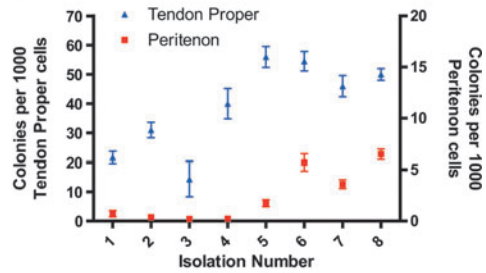

**SUPPLEMENTARY FIG. S1.** Sequential enzymatic isolation consistently resulted in differences in abundance of stem/progenitors by region. Each sequential enzymatic dissociation of tendon proper versus paratenon resulted in the consistent finding that more stem/progenitor cells (per 1000 cells seeded) were found in the tendon proper relative to the peritenon. **(A)** To further analyze the technical replicates, a *t*-test was done for each individual isolation. For all eight isolations, the difference was significant. There was no incidence of overlap between values intra- and interisolation. **(B)** This consistency is clearly depicted in a plot of the means and standard deviations of colony counts by isolation (Tendon Proper,  $\blacktriangle$ ; Peritenon,  $\blacksquare$ ).
