# Supplementary material
Source: PubMed Central journal article supplement (PMC3530943)
Supplement: Supp_Fig2.pdf [file Supp_Fig2.pdf]

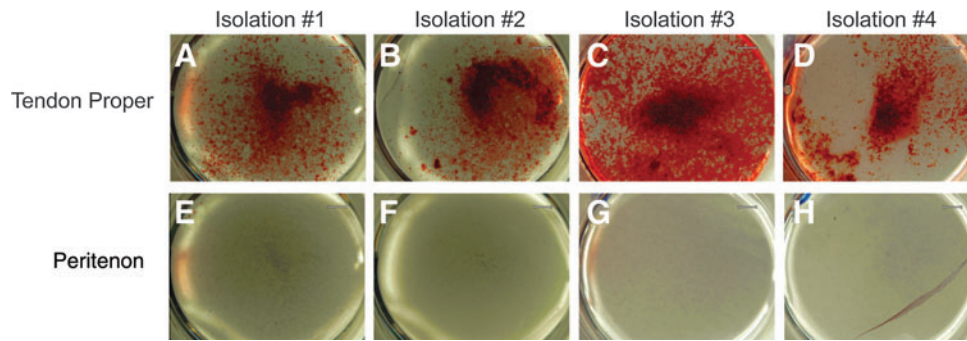

**SUPPLEMENTARY FIG. S2.** Stem/progenitor cells isolated from both tendon proper and peritenon consistently demonstrate calcification differences in osteogenic culture. Tendon proper-derived stem/progenitor cells (**A–D**) were capable of osteogenic differentiation with deposition of calcium nodules within the cell layer *in vitro*. Peritenon-derived stem/progenitor cells (**G–H**), however, while expressing bone marker osteopontin *in vitro*, were incapable of deposition of calcified matrix within the cell layer *in vitro*. This difference in calcification consistently occurred for each culture. Four paired (tendon proper vs. peritenon) biological replicates are represented by the panels: **A** versus **E**, **B** versus **F**, **C** versus **G**, and **D** versus **H**. (Bar: 2 mm).
