# Supplementary material
Source: PubMed Central journal article supplement (PMC3530943)
Supplement: Supp_Table1.pdf [file Supp_Table1.pdf]

SUPPLEMENTARY TABLE S1. CONSISTENT DIFFERENCES IN EXPRESSION OF TENDON VERSUS VASCULAR AND PERICYTE MARKERS DEMONSTRATE A DIFFERENTIAL ENRICHMENT FOR CELL ORIGIN IN THE TENDON PROPER VERSUS PERITENON

| <i>Tnmd/Actb</i>        |                  |                      | <i>Emcn/Actb</i>        |                  |                      |
|-------------------------|------------------|----------------------|-------------------------|------------------|----------------------|
| <i>Isolation number</i> | <i>Peritenon</i> | <i>Tendon proper</i> | <i>Isolation number</i> | <i>Peritenon</i> | <i>Tendon proper</i> |
| 1                       | 3.077            | <b>16.166</b>        | 1                       | <b>913.147</b>   | 1.0354               |
| 2                       | 0.373            | <b>35.177</b>        | 2                       | <b>99.772</b>    | 74.949               |
| 3                       | 0.159            | <b>2.957</b>         | 3                       | <b>100.541</b>   | 73.789               |
| 4                       | 6.046            | <b>8.014</b>         | 4                       | <b>58.641</b>    | 46.639               |
| 5                       | 1.720            | <b>22.602</b>        | 5                       | <b>156.249</b>   | 3.878                |
| 6                       | 2.303            | <b>56.801</b>        | 6                       | <b>1245.690</b>  | 45.235               |
| 7                       | <b>8.153</b>     | 6.489                | 7                       | <b>41.178</b>    | 31.135               |

  

| <i>Scx/Actb</i>         |                  |                      | <i>Cd133/Actb</i>       |                  |                      |
|-------------------------|------------------|----------------------|-------------------------|------------------|----------------------|
| <i>Isolation number</i> | <i>Peritenon</i> | <i>Tendon proper</i> | <i>Isolation number</i> | <i>Peritenon</i> | <i>Tendon proper</i> |
| 1                       | <b>24.715</b>    | 16.168               | 1                       | <b>7.862</b>     | 1.079                |
| 2                       | 4.626            | <b>18.556</b>        | 2                       | <b>19.0375</b>   | 1.924                |
| 3                       | 4.823            | <b>23.757</b>        | 3                       | <b>43.258</b>    | 11.223               |
| 4                       | 4.615            | <b>10.700</b>        | 4                       | 9.997            | <b>13.533</b>        |
| 5                       | 13.703           | <b>59.119</b>        | 5                       | <b>6.183</b>     | 1.050                |
| 6                       | 20.157           | <b>127.672</b>       | 6                       | <b>33.779</b>    | 3.900                |
| 7                       | 4.932            | <b>92.049</b>        | 7                       | 6.249            | <b>6.353</b>         |

Gene expression for tendon markers Tenomodulin (Tnmd) and Scleraxis (Scx) is consistently higher in stem/progenitors of the tendon proper, while gene expression for vascular marker, Endomucin (Emcn), and pericyte marker (Cd133) is consistently greater for peritenon-derived stem/progenitor cells. The values given for each paired biological replicate are mean transcript abundance for each target gene relative to Actb. **Bold numbers** represent the greater values of the pairs. Each mean is determined from three technical replicates via qPCR. All values  $\times 10^{-4}$ .
